# Supplementary material for: Distinct Roles of Tensile and Compressive Stresses in Graphitizing and Properties of Carbon Nanofibers
Source: MDPI journal article supplement (doi:10.3390/mi12091096), 2021-09-11
Supplement: s1 [file s1]

## Supplementary Information

### Distinct roles of tensile and compressive stresses in graphitizing pyrolytic carbon nanofibers

Manuscript Number: *micromachines-1346757*

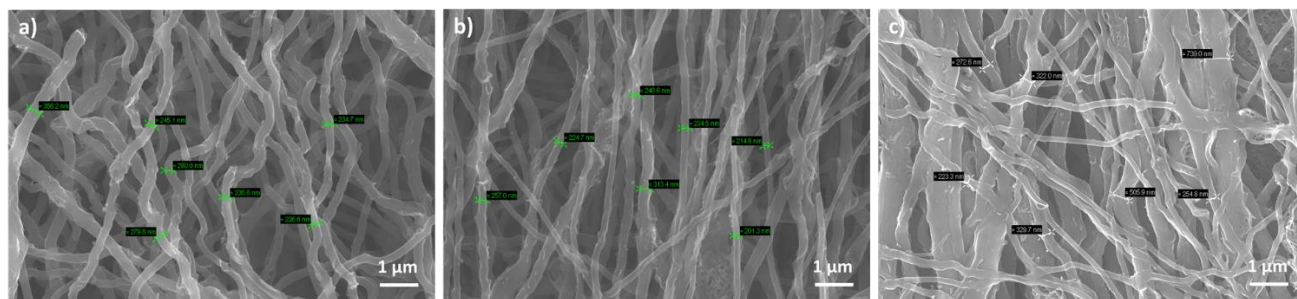

**Figure S1.** Measuring diameters of different carbon nanofibers using the SEM images of PAN-based carbon samples: (a) without mechanical treatment, (b) tension-induced TIPC, and (c) compression-induced CIPC. The average diameter of each type of carbon nanofibers are obtained by averaging the measurements in each SEM micrograph.

| Sample Treatment       | Average Fiber Diameter (nm) | Standard Deviation (nm) |
|------------------------|-----------------------------|-------------------------|
| No Treatment, Fig S1-a | 267.0                       | 44.1                    |
| TIPC, Fig S1-b         | 241.8                       | 36.7                    |
| CIPC, Fig S1-c         | 378.2                       | 183.7                   |

**Table S1.** Average nanofiber diameters for untreated PC, TIPC, and CIPC with standard deviation, obtained from the SEM micrographs in Figure S1.

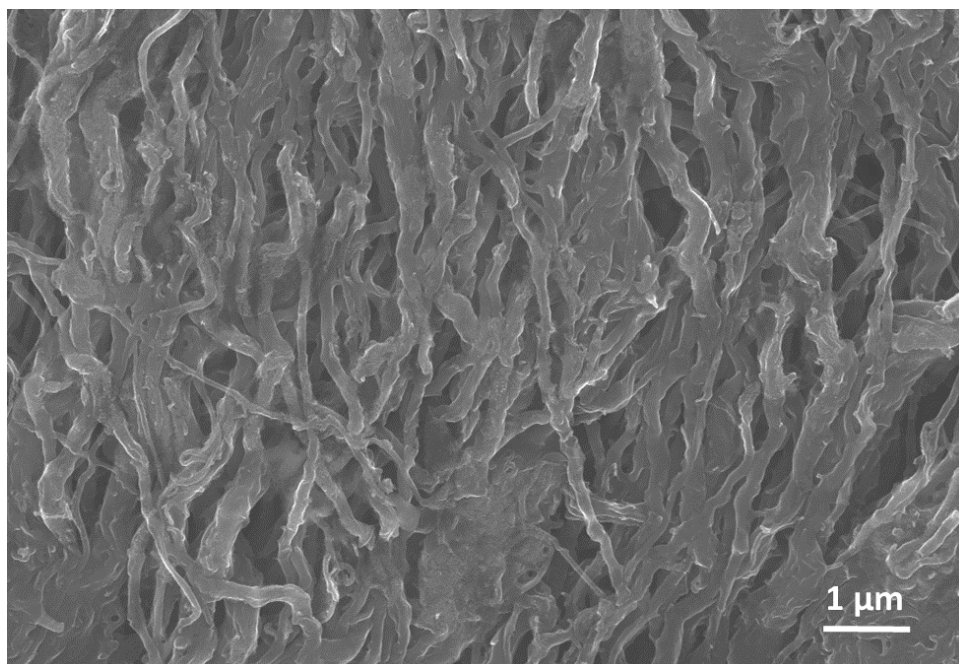

**Figure S2.** Compression treatment of PAN nanofibers at 120 °C, has initiated the crosslinking between the individual electrospun fibers. In many areas across CIPC fabric, the nanofibers merged and formed a more continuous layer of carbon with a lower porosity compared to untreated and TIPC samples. Additionally, CIPC nanofibers have larger average diameters and appear to have “flattened” cross sections.
